# Supplementary material
Source: PubMed Central journal article supplement (PMC2725569)
Supplement: supp_8_8_1228__1.pdf [file supp_8_8_1228__1.pdf]

# Supplementary Figure 1

Preußner *et al.*

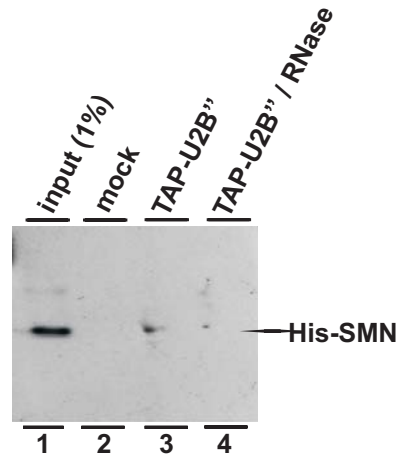

## Supplementary Figure 1.

Specificity control of affinity purification of TAP-tagged U2B'' complexes.

Extract was prepared from a *T.brucei* cell line stably expressing TAP-tagged U2B'' protein (lanes 3 and 4) or from the *T.brucei* wild-type strain 427 (*mock*; lane 2), both with the addition of recombinant His-SMN protein (1 ug per 200  $\mu$ l extract; Palfi *et al.*, 2009). Extracts were treated with RNase A (lane 4) or left untreated (lane 3). Following precipitation by IgG Sepharose, TAP-U2B''-associated proteins were analyzed by SDS-PAGE and Western blotting with anti-His antibodies. For comparison, 1% of the input was analyzed (lane 1). The position of His-SMN is marked on the right.

Palfi, Z., N. Ja e, C. Pre ssner, K. H. Kaminska, J. M. Bujnicki, J. H. Lee, A. G nzl, C. Kambach, H. Urlaub, and A. Bindereif (2009). SMN-assisted assembly of snRNP-specific Sm cores in trypanosomes. *Genes Dev.*, in press.

# Supplementary Figure 2

Preußer *et al.*

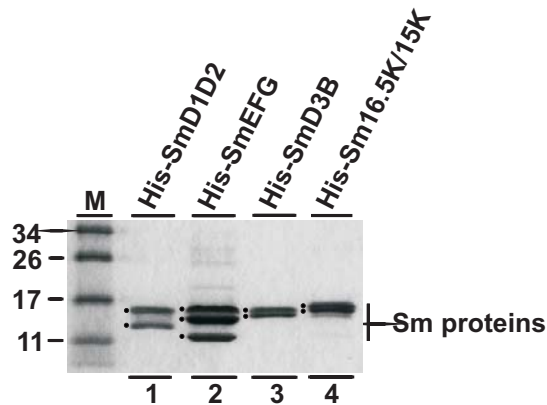

## Supplementary Figure 2.

Protein analysis of His-tagged Sm subcomplexes.

Sm subcomplexes His-SmD1/D2 (lane 1), His-SmE/F/G (lane 2), His-SmD3/B (lane 3), and His-Sm16.5K/15K (lane 4) were expressed and purified as described (34). Subcomplexes were analyzed by SDS-PAGE and Coomassie-stained (Sm polypeptides marked by dots). Sizes of marker proteins are indicated in kDa.
